# Supplementary material for: Ghrelin Suppresses Glucose-Stimulated Insulin Secretion and Deteriorates Glucose Tolerance in Healthy Humans
Source: PubMed Central journal article supplement — Diabetes. 2010 Jun 28;59(9):2145–51. doi: 10.2337/db10-0504 (PMC2927935; doi:10.2337/db10-0504), 2010-06-28

**ONLINE APPENDIX: Supplemental Material:**

**Table 1:** Plasma total ghrelin levels during saline, 0.3, 0.9, or 1.5 nmol/kg/hr dose acyl ghrelin continuous IV infusion prior to IVGTT (0-54 minutes) in healthy men (n = 8) and women (n = 4).

| Plasma total ghrelin (pM) | Ghrelin infusion rate |                |                |                |
|---------------------------|-----------------------|----------------|----------------|----------------|
| Infusion time (min)       | Saline                | 0.3 nmol/kg/hr | 0.9 nmol/kg/hr | 1.5 nmol/kg/hr |
| 0                         | 292.3 ± 31.8          | 314.6 ± 26.6   | 300.1 ± 31.4   | 311.3 ± 36.2   |
| 45                        | 299.3 ± 33.5          | 1362.6 ± 85.2  | 4356.7 ± 341.0 | 6956.4 ± 487.4 |
| 50                        | 294.2 ± 32.2          | 1432.6 ± 80.6  | 4673.5 ± 422.8 | 7144.8 ± 604.3 |
| 54                        | 345.1 ± 27.3          | 1495.7 ± 95.0  | 4894.0 ± 226.7 | 7061.8 ± 538.1 |

**Figure 1:** Administration of acyl ghrelin at doses of 0.3, 0.9, or 1.5 nmol/kg/hr did not alter plasma glucagon levels.

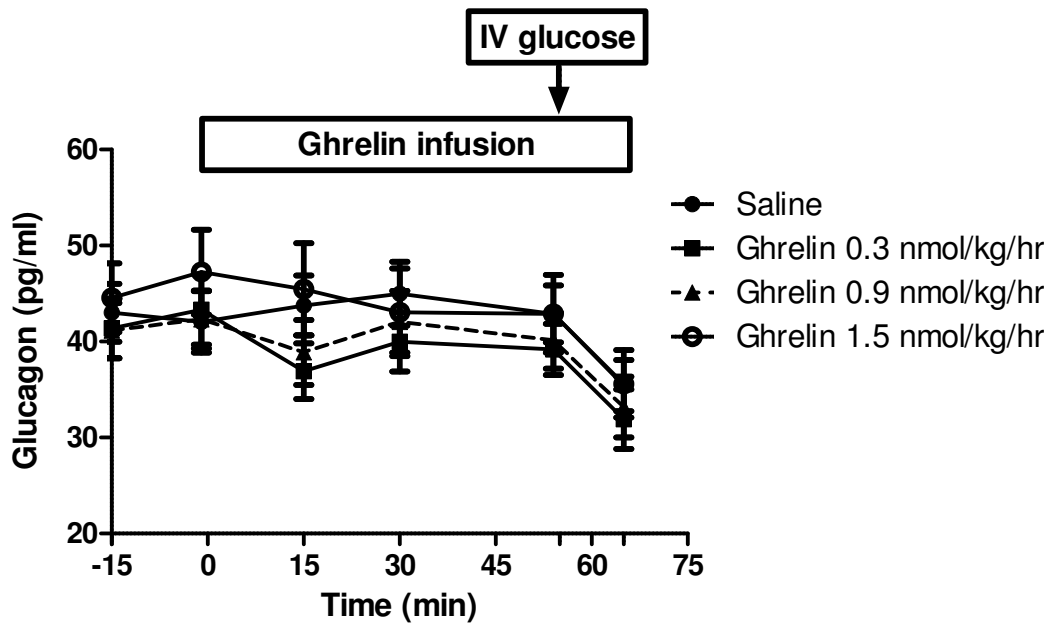

**Figure 2:** Acyl ghrelin had no effect on plasma catecholamine levels. Epinephrine and norepinephrine were measured as described in the Methods section. Plasma levels of both catecholamines were low and were unchanged throughout the study.

A.

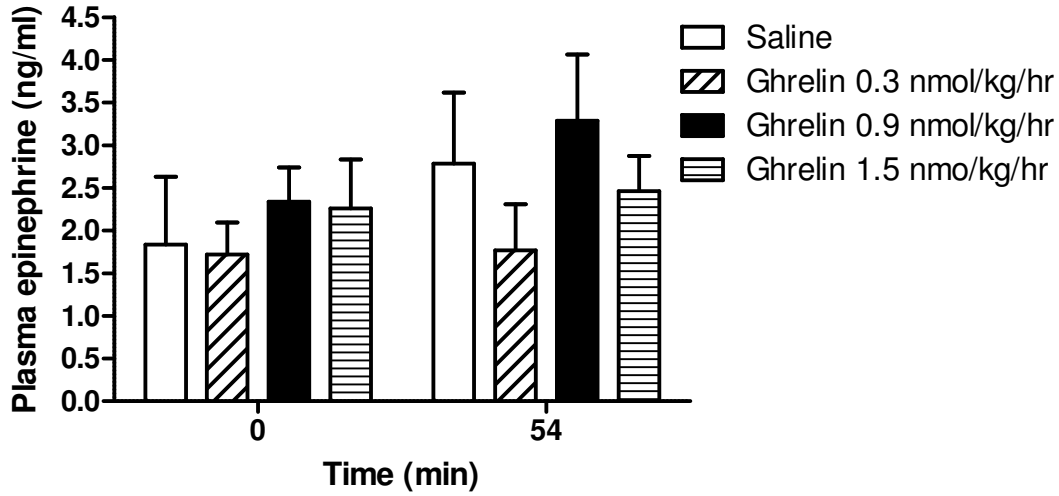

B.

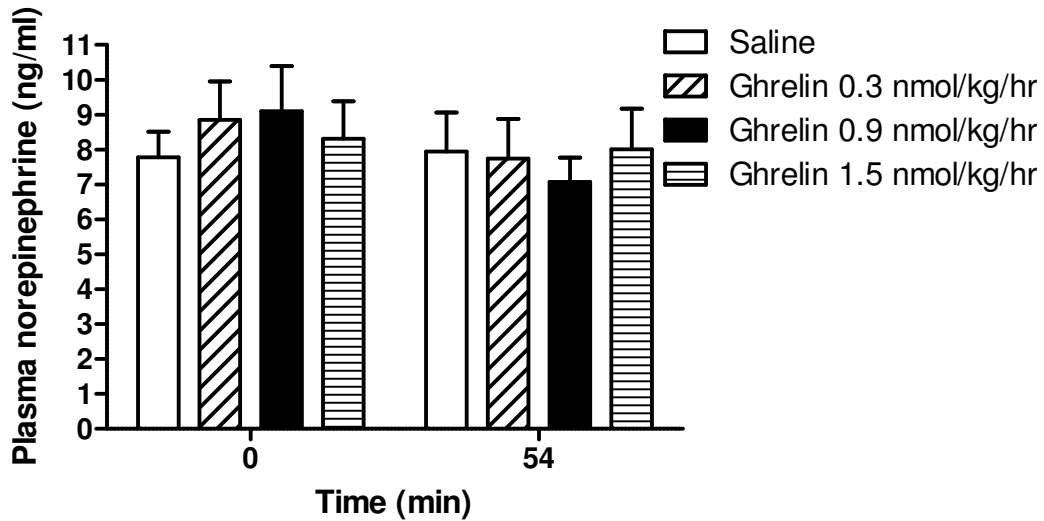

Supplement: supp_db10-0504_DB100504ONLINEAPPENDIX.pdf [file supp_db10-0504_DB100504ONLINEAPPENDIX.pdf]
